# Supplementary material for: Carbon-coated NiSe nanoparticles anchored on reduced graphene oxide: a high-rate and long-life anode for potassium-ion batteries
Source: Royal Society of Chemistry journal article supplement (doi:10.1039/d1se00607j), 2021-01-01
Supplement: d1se00607j1.pdf [file d1se00607j1.pdf]

## ***Electronic Supporting Information***

### **Carbon-coated NiSe nanoparticles anchored on reduced graphene oxide: a high-rate and long-life anode for potassium-ion batteries**

*Xinning Mao<sup>a,b</sup>, Xin Gu<sup>a,\*</sup>, Sheng Wen<sup>a,b</sup>, Li Zhang<sup>a,b</sup>, Pengcheng Dai<sup>a</sup>, Liangjun Li<sup>a</sup>,*

*Dandan Liu<sup>a</sup>, Dawei Li<sup>b</sup>, Zhi Li<sup>c</sup>, Kuitong Zhang<sup>c</sup>, and Xuebo Zhao<sup>a,b,\*</sup>*

<sup>a</sup> *College of New Energy, China University of Petroleum (East China), Qingdao 266580, P. R. China.*

<sup>b</sup> *State Key Laboratory of Heavy Oil Processing, College of Chemical Engineering, China University of Petroleum (East China), Qingdao 266580, P. R. China.*

<sup>c</sup> *Yankuang Group Co. Ltd, Jining 273500, P. R. China.*

\* Corresponding author.

*E-mail address: guxin@upc.edu.cn (X. Gu); zhaoxuebo@upc.edu.cn (X. Zhao)*

## Supporting Figures and Table

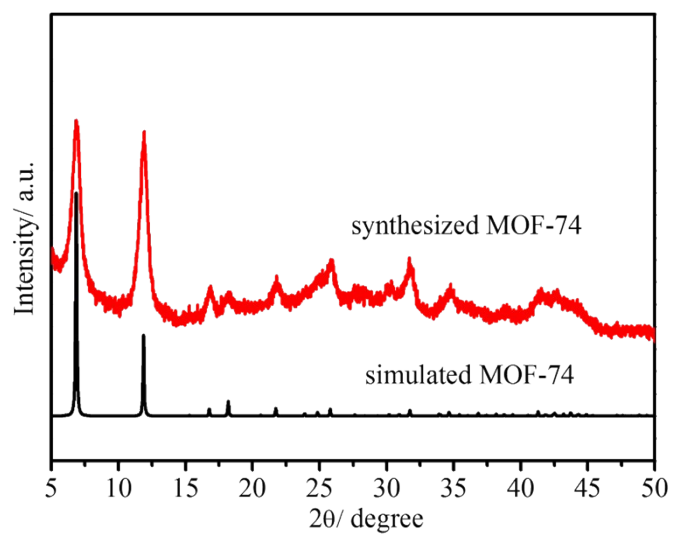

Fig. S1 XRD patterns of as-synthesized MOF-74-Ni/GO and simulated MOF-74.

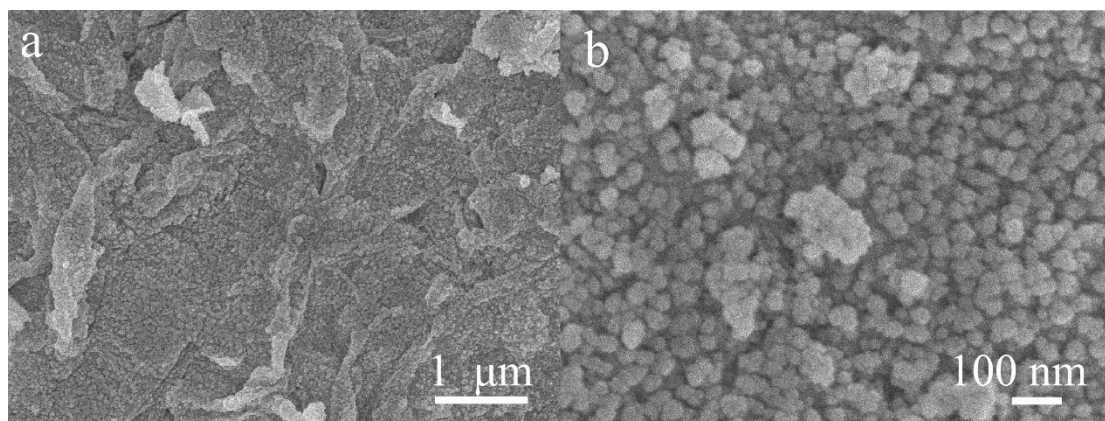

Fig. S2 SEM images of as-synthesized MOF-74-Ni/GO.

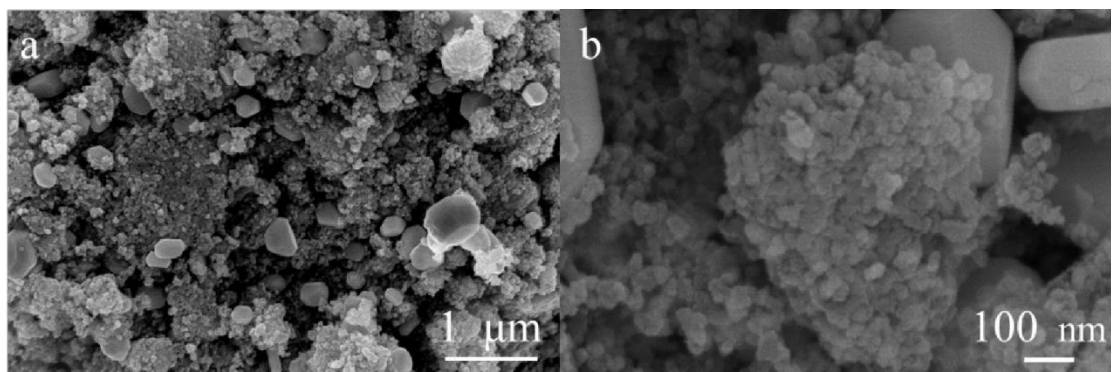

Fig. S3 SEM images of NiSe@C nanocomposites.

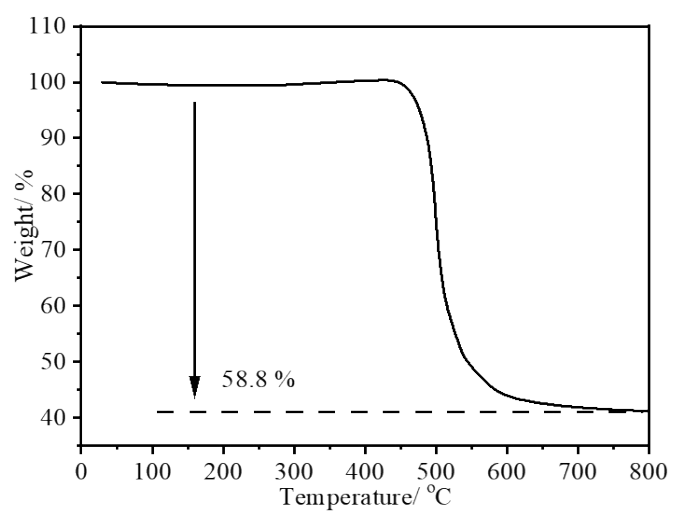

Fig. S4 TG curve of NiSe@C/rGO in air at a heating rate of  $10\text{ }^{\circ}\text{C min}^{-1}$ .

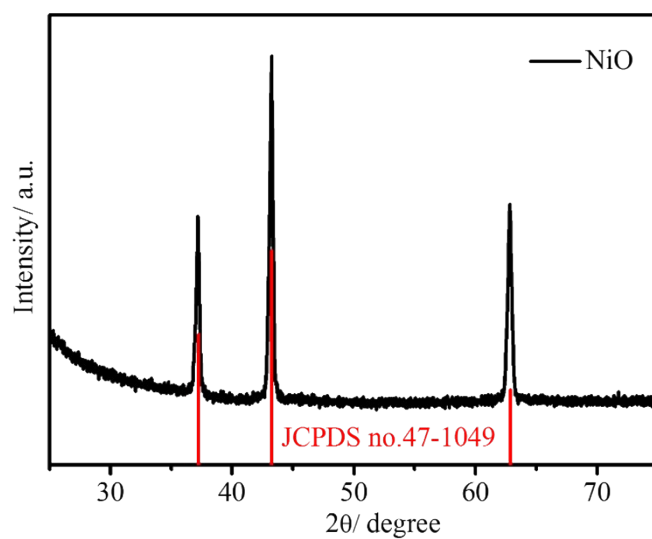

Fig. S5 XRD pattern of the product obtained by the annealing of NiSe@C/rGO at 800 °C in air at a heating rate of 10 °C min<sup>-1</sup>.

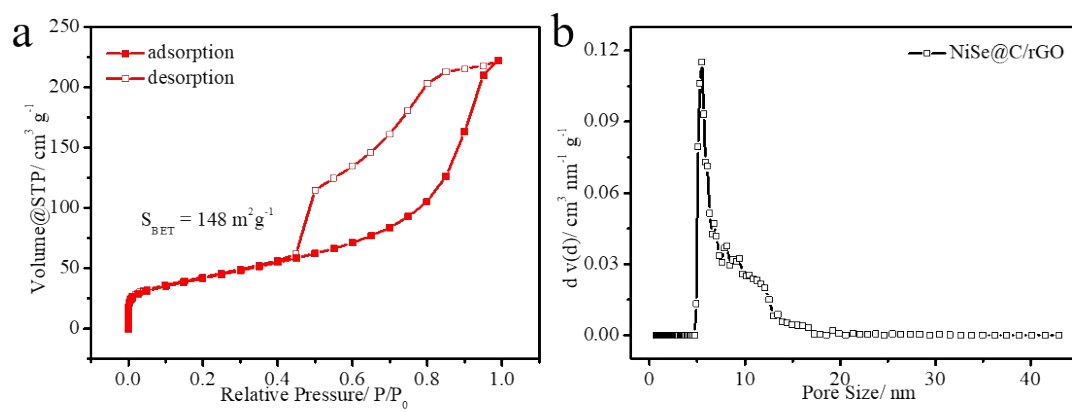

Fig. S6 (a) N<sub>2</sub> sorption isotherm, and (b) pore-size distribution curve of NiSe@C/rGO.

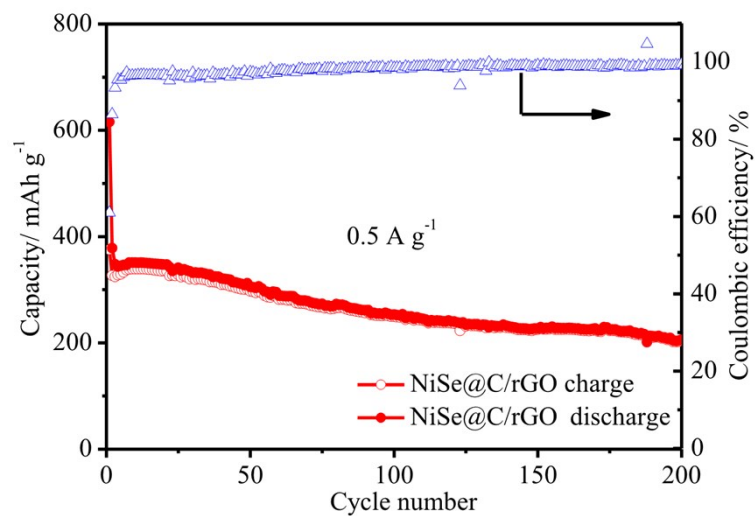

Fig. S7 Cycling performance of NiSe/C@rGO electrode at  $0.5 \text{ A g}^{-1}$ .

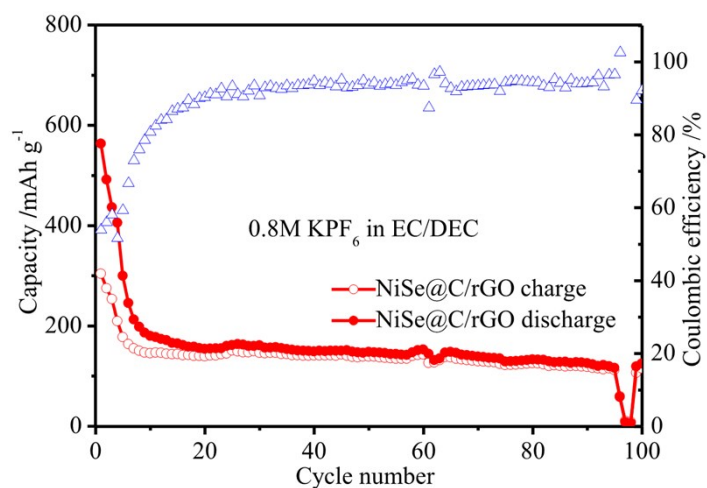

Fig. S8 Cycling performance of NiSe/C@rGO electrode in  $\text{KPF}_6$  electrolyte at  $0.2 \text{ A g}^{-1}$ , and the corresponding coulombic efficiencies.

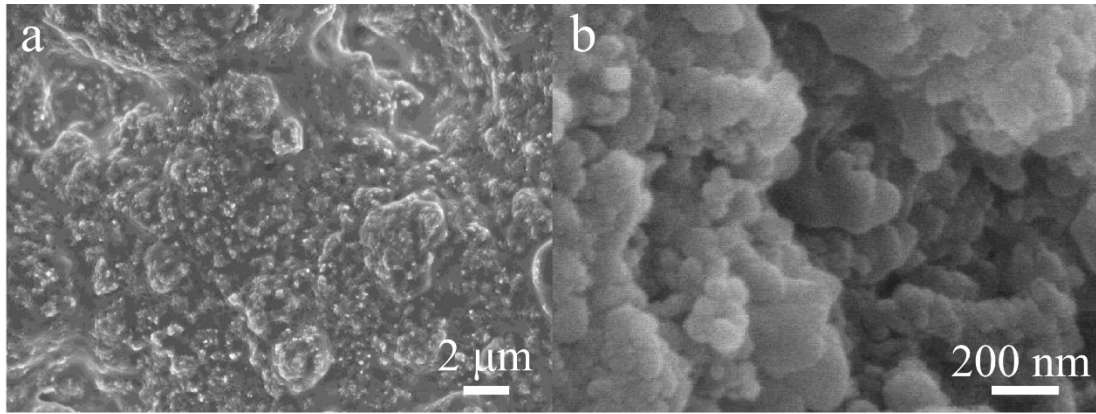

Fig. S9 SEM images of NiSe@C/rGO electrode after 50 cycles.

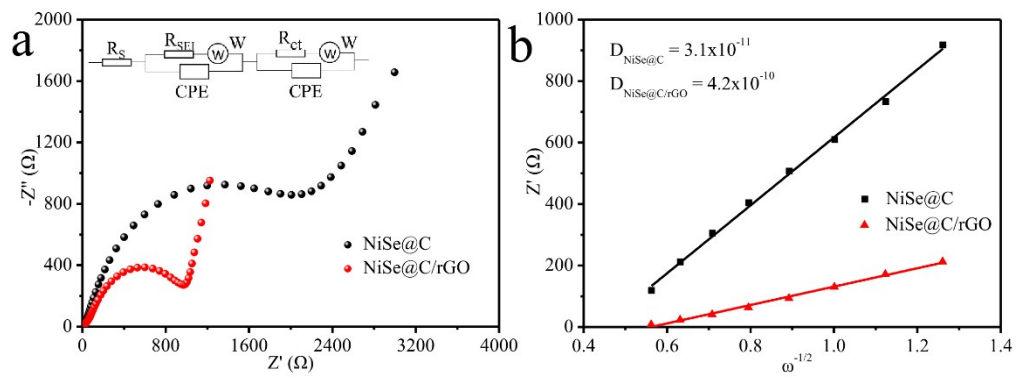

Fig. S10 (a) Nyquist plots and equivalent circuit of NiSe@C/rGO and NiSe@C, (b)

The relationship between  $Z'$  and  $\omega^{-1/2}$  for NiSe@C/rGO and NiSe@C.

**Table S1** Electrical conductivities for NiSe@C/rGO and NiSe@C.

| Sample     | 1    | 2    | 3    | 4    | 5    | Average<br>(S m <sup>-1</sup> ) |
|------------|------|------|------|------|------|---------------------------------|
| NiSe@C/rGO | 17.0 | 18.2 | 16.7 | 17.5 | 17.0 | 17.3                            |
| NiSe@C     | 11.6 | 11.4 | 11.5 | 10.4 | 10.2 | 11.0                            |

**Table S2.** Conversion and alloying materials for PIBs.

| Anode material                        | Reversible capacity<br>(mAh g <sup>-1</sup> ) @cycle<br>number | Current density<br>(mA g <sup>-1</sup> ) | Reference        |
|---------------------------------------|----------------------------------------------------------------|------------------------------------------|------------------|
| <b>NiSe@C/rGO</b>                     | <b>301@700</b>                                                 | <b>200</b>                               | <b>This work</b> |
| ZnSe NP@NHC                           | 132@1200                                                       | 100                                      | [1]              |
| CPL-CuSe                              | 280@340                                                        | 5000                                     | [2]              |
| Co <sub>0.85</sub> Se QDs/C           | 402@50                                                         | 100                                      | [3]              |
| MoSe <sub>2</sub> /C                  | 322@100                                                        | 200                                      | [4]              |
| CoSe <sub>2</sub> /N-C                | 253@100                                                        | 200                                      | [5]              |
| VSe <sub>2</sub>                      | 335@200                                                        | 200                                      | [6]              |
| Co <sub>0.85</sub> Se@NC              | 114@250                                                        | 1000                                     | [7]              |
| FeMoSe <sub>4</sub> @N-C              | 298@100                                                        | 200                                      | [8]              |
| MoSe <sub>2</sub> /Mxene/C            | 335@100                                                        | 200                                      | [9]              |
| MoSe <sub>2</sub> /C-700              | 316@100                                                        | 100                                      | [10]             |
| Sb <sub>2</sub> Se <sub>3</sub> NDs@C | 312@200                                                        | 1000                                     | [11]             |
| Sb <sub>2</sub> Se <sub>3</sub> @C    | 313@40                                                         | 100                                      | [12]             |
| Se/C                                  | 396@100                                                        | 200                                      | [13]             |
| FeS <sub>2</sub> @C                   | 308@100                                                        | 300                                      | [14]             |
| CoS@G                                 | 311@100                                                        | 500                                      | [15]             |
| VS <sub>2</sub> nanosheet             | 360@100                                                        | 500                                      | [16]             |
| MoS <sub>2</sub> /N-C                 | 212@200                                                        | 100                                      | [17]             |
| Sb <sub>2</sub> S <sub>3</sub> /C     | 404@200                                                        | 500                                      | [18]             |
| Sn <sub>4</sub> P <sub>3</sub> @C     | 403@200                                                        | 50                                       | [19]             |
| red P@N-C                             | 650@100                                                        | 100                                      | [20]             |

## Supporting references

- [1] Y. He, L. Wang, C. Dong, C. Li, X. Ding, Y. Qian and L. Xu, *Energy Storage Materials*, 2019, **23**, 35-45.
- [2] H. Lin, M. Li, X. Yang, D. Yu, Y. Zeng, C. Wang, G. Chen and F. Du, *Adv. Energy Mater.*, 2019, **9**, 1900323.
- [3] Z. Liu, K. Han, P. Li, W. Wang, D. He, Q. Tan, L. Wang, Y. Li, M. Qin and X. Qu, *Nano-Micro Lett.*, 2019, **11**, 96.
- [4] W. Wang, B. Jiang, C. Qian, F. Lv, J. Feng, J. Zhou, K. Wang, C. Yang, Y. Yang and S. Guo, *Adv. Mater.*, 2018, **30**, 1801812.

- [5] Q. Yu, B. Jiang, J. Hu, C.-Y. Lao, Y. Gao, P. Li, Z. Liu, G. Suo, D. He, W. Wang and G. Yin, *Adv. Sci.*, 2018, **5**, 1800782.
- [6] C. Yang, J. Feng, F. Lv, J. Zhou, C. Lin, K. Wang, Y. Zhang, Y. Yang, W. Wang, J. Li and S. Guo, *Adv. Mater.*, 2018, **30**, 1800036.
- [7] G. Ma, C. Li, F. Liu, M. K. Majeed, Z. Feng, Y. Cui, J. Yang and Y. Qian, *Mater. Today Energy*, 2018, **10**, 241-248.
- [8] J. Chu, Q. Yu, D. Yang, L. Xing, C.-Y. Lao, M. Wang, K. Han, Z. Liu, L. Zhang and W. Du, *Appl. Mater. Today*, 2018, **13**, 344-351.
- [9] H. Huang, J. Cui, G. Liu, R. Bi and L. Zhang, *ACS Nano*, 2019, **13**, 3448-3456.
- [10] Q. Shen, P. Jiang, H. He, C. Chen, Y. Liu and M. Zhang, *Nanoscale*, 2019, **11**, 13511-13520.
- [11] L. Yang, W. Hong, Y. Tian, G. Zou, H. Hou, W. Sun and X. Ji, *Chem. Eng. J.*, 2020, **385**, 123838.
- [12] Z. Yi, Y. Qian, J. Tian, K. Shen, N. Lin and Y. Qian, *J. Mater. Chem. A*, 2019, **7**, 12283-12291.
- [13] Y. Liu, Z. Tai, Q. Zhang, H. Wang, W. K. Pang, H. K. Liu, K. Konstantinov and Z. Guo, *Nano Energy*, 2017, **35**, 36-43.
- [14] Y. Zhao, J. Zhu, S. J. H. Ong, Q. Yao, X. Shi, K. Hou, Z. J. Xu and L. Guan, *Adv. Energy Mater.*, 2018, **8**, 1802565.
- [15] H. Gao, T. Zhou, Y. Zheng, Q. Zhang, Y. Liu, J. Chen, H. Liu and Z. Guo, *Adv. Funct. Mater.*, 2017, **27**, 1702634.
- [16] J. Zhou, L. Wang, M. Yang, J. Wu, F. Chen, W. Huang, N. Han, H. Ye, F. Zhao and Y. Li, *Adv. Mater.*, 2017, **29**, 1702061.
- [17] B. Jia, Q. Yu, Y. Zhao, M. Qin, W. Wang, Z. Liu, C. Y. Lao, Y. Liu, H. Wu and Z. Zhang, *Adv. Funct. Mater.*, 2018, **28**, 1803409.
- [18] Y. Liu, Z. Tai, J. Zhang, W. K. Pang, Q. Zhang, H. Feng, K. Konstantinov, Z. Guo and H. K. Liu, *Nat. Commun.*, 2018, **9**, 3645.
- [19] W. Zhang, W. K. Pang, V. Sencadas and Z. Guo, *Joule*, 2018, **2**, 1534-1547.
- [20] Y. Wu, S. Hu, R. Xu, J. Wang, Z. Peng, Q. Zhang and Y. Yu, *Nano Lett.*, 2019, **19**, 1351-1358.
